## ERRATA

I. Green and I. Etsion, "A Kinematic Model for Mechanical Seals With Antirotation Locks or Positive Drive Devices," **Journal of Tribology**, Vol. 108, Jan. 1986, pp. 42–45.

The following errors appeared in the foregoing paper.

1. Page 42: Professor Green's current address is Georgia Institute of Technology, Atlanta, Ga.
2. Page 42: Col. 1, line 19—comma should be deleted after the word "slots"
3. Nomenclature—lambda and omega (with sub  $c$ ) should be bold face
4. Page 43: Equation (3): super 2 should be inserted after the third gamma  
Equation (4): + . . . should be added to end of equation  
Equation (5): . . . should be added to end of equation
5. Page 44: Equation (8): super 2 should be inserted after second "sin" in denominator  
Equation (12):  $x$  should be changed to times ( $\times$ ) sign  
Equation (14): lambda and omega should be bold face  
Equation (16): omega should be bold face; psi should have over-dot  
Equation (17): lambda should be bold face  
Equation (19c): last term should read  $O(\gamma_s^2)$
6. Page 45: Line six: omega should be bold face  
Equation (22): lambda should be bold face  
Equation (24c): should read  $O(\gamma^2)$   
Reference [8]: second author's name is F. W. Ocvirk
